# Supplementary material
Source: publisher figshare collection journal article supplement (https://acs.figshare.com/ndownloader/files/3867460)
Supplement: Supplementary file 1 [file 3867460]

*Supporting Information for*  
**“New Insights Into the Short-Range Structures of Microporous Titanosilicates as  
 Revealed by  $^{47/49}\text{Ti}$ ,  $^{23}\text{Na}$ ,  $^{39}\text{K}$ , and  $^{29}\text{Si}$  Solid-State NMR Spectroscopy”**

Jun Xu,<sup>a</sup> Bryan Lucier,<sup>a</sup> Zhi Lin,<sup>b</sup> Andre Sutrisno,<sup>a</sup> Victor V. Tersikh,<sup>c</sup> and Yining  
 Huang<sup>a,\*</sup>

<sup>a</sup> Department of Chemistry, The University of Western Ontario, London, Ontario, Canada N6A 5B7

<sup>b</sup> Department of Chemistry, CICECO, University of Aveiro, 3810 Aveiro, Portugal

<sup>c</sup> Department of Chemistry, University of Ottawa, Ottawa, Ontario, Canada, K1N 6N5

\*Corresponding author, Tel: (519)661-2111 x 86384, Email: yhuang@uwo.ca.

### Table of Contents

| <u>Item</u>                                                                                                                                | <u>Page</u> |
|--------------------------------------------------------------------------------------------------------------------------------------------|-------------|
| <b>Figure S1.</b> Powder XRD patterns                                                                                                      | S2          |
| <b>Table S1.</b> $^{47/49}\text{Ti}$ SSNMR acquisition parameters                                                                          | S3          |
| <b>Figure S2.</b> $^{47/49}\text{Ti}$ SSNMR echo spectra of natisite, AM-1, and AM-4                                                       | S4          |
| <b>Section S1.</b> $^{29}\text{Si}$ and $^{23}\text{Na}$ SSNMR experimental parameters                                                     | S5          |
| <b>Table S2.</b> $^{23}\text{Na}$ SSNMR acquisition parameters                                                                             | S6          |
| <b>Section S2.</b> $^{23}\text{Na}$ MAS and 3QMAS spectra                                                                                  | S6          |
| <b>Figure S3.</b> $^{23}\text{Na}$ MAS SSNMR spectra at 9.4 T                                                                              | S6          |
| <b>Figure S4.</b> $^{23}\text{Na}$ 3QMAS spectra at 9.4 T                                                                                  | S8          |
| <b>Section S3.</b> $^{29}\text{Si}$ MAS SSNMR spectra                                                                                      | S9          |
| <b>Figure S5.</b> $^{29}\text{Si}$ MAS SSNMR spectra at 9.4 T                                                                              | S9          |
| <b>Figure S6.</b> Two Polymorphs of ETS-10                                                                                                 | S10         |
| <b>Section S4.</b> $^{47/49}\text{Ti}$ and $^{23}\text{Na}$ SSNMR experiments on ETS-4                                                     | S11         |
| <b>Figure S7.</b> Structure and $^{47/49}\text{Ti}$ static spectra of ETS-4 at 21.1 T                                                      | S13         |
| • <b>Appendix A:</b> Plane-wave DFT calculations of $^{23}\text{Na}$ , $^{29}\text{Si}$ , and $^{47/49}\text{Ti}$ NMR<br>tensor parameters | S14         |
| <b>Table A1.</b> Experimental and calculated $^{29}\text{Si}$ NMR parameters                                                               | S16         |
| <b>Table A2.</b> Experimental and calculated $^{23}\text{Na}$ NMR parameters                                                               | S17         |
| <b>Table A3.</b> Experimental and calculated $^{49}\text{Ti}$ NMR parameters                                                               | S18         |
| <b>Figure A1.</b> Correlation of experimental and calculated NMR parameters                                                                | S19         |
| <b>Figure A2.</b> Correlation of $^{23}\text{Na}$ chemical shifts versus shieldings                                                        | S20         |
| <b>References</b>                                                                                                                          | S20         |

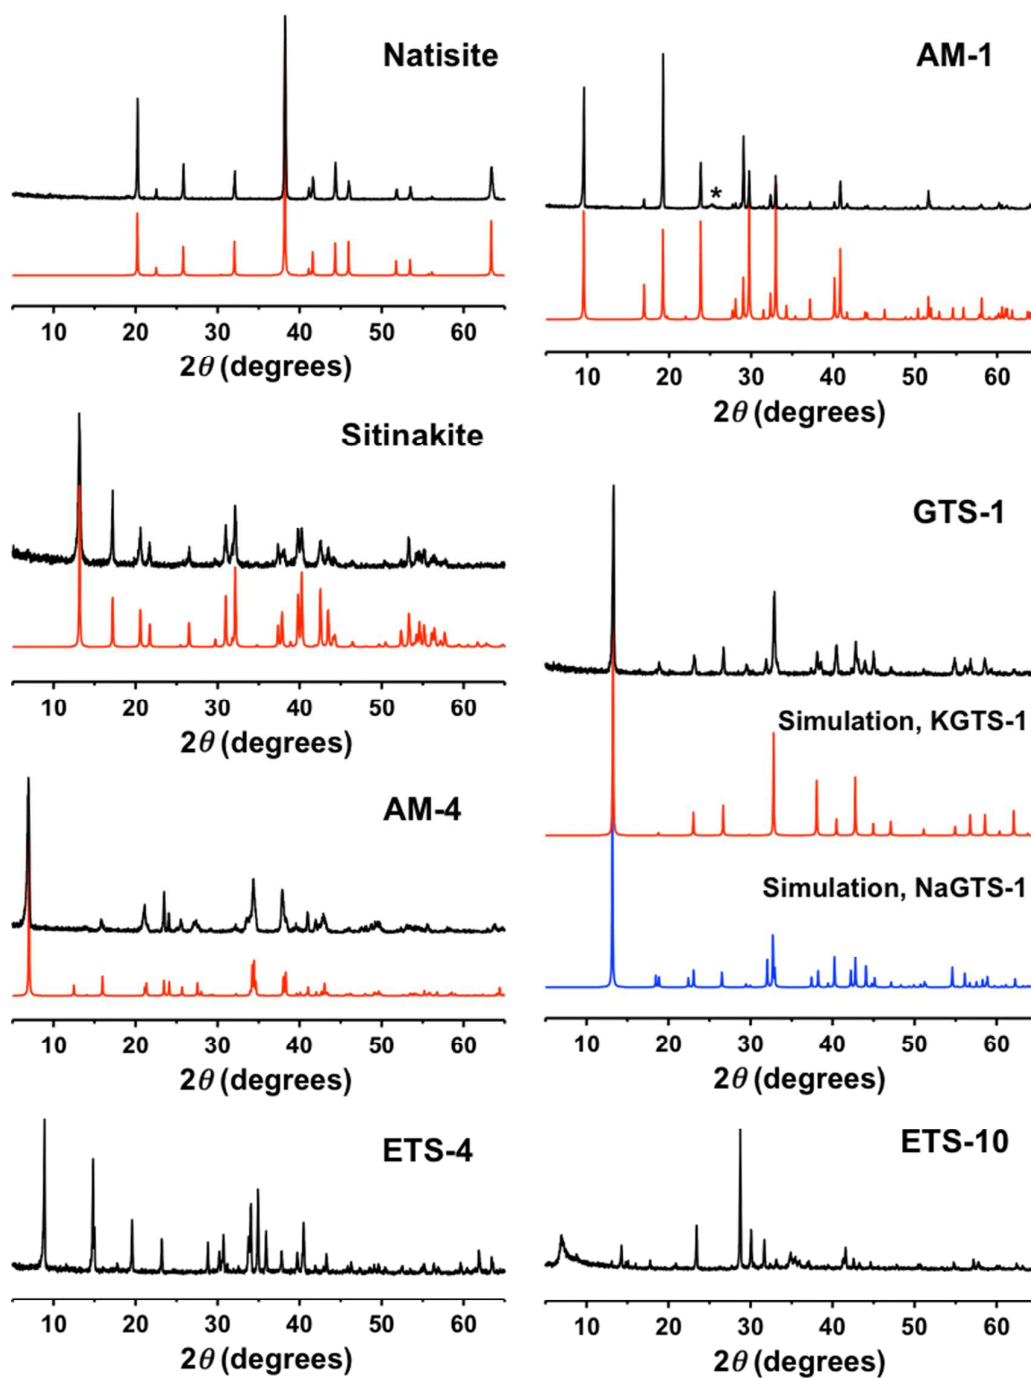

**Figure S1.** The powder XRD patterns of titanasilicates are shown above. The black trace is experimental data, the red trace are simulations based on reported crystal structures. The asterisk (\*) denotes an impurity.

**Table S1.** <sup>47/49</sup>Ti SSNMR acquisition parameters at 21.1 T.

| Sample     | Experiment       | Pulse delay (s) | Number of scans <sup>a</sup> |
|------------|------------------|-----------------|------------------------------|
| Natisite   | WURST-CPMG       | 1               | 2048                         |
|            | WURST echo       | 0.5             | 65536 <sup>b</sup>           |
|            | Quadrupolar echo | 0.5             | 49152                        |
| AM-1       | WURST-CPMG       | 0.5             | 24588 (3 × 8196)             |
|            | WURST echo       | 0.5             | 98304 <sup>b</sup>           |
| AM-4       | WURST-CPMG       | 0.5             | 24588 (3 × 8196)             |
|            | Quadrupolar echo | 0.5             | 49152                        |
| Sitinakite | Quadrupolar echo | 1               | 49152                        |
| GTS-1      | Quadrupolar echo | 0.5             | 123904                       |
|            | WURST-CPMG       | 0.5             | 24588 (3 × 8196)             |
| ETS-10     | Quadrupolar echo | 1               | 49152                        |
| ETS-4      | Quadrupolar echo | 0.5             | 118784                       |

<sup>a</sup> The value given is the total number of scans. In cases where the powder pattern is constructed from several “pieces” or subspectra, this value denotes the total number of scans performed on the entire powder pattern, not the number of scans of each subspectrum (except for WURST-echo, see footnote <sup>b</sup>). The WURST-CPMG spectra of AM-1, AM-4, and GTS-1 were assembled from three individual subspectra, all other spectra did not require piecewise addition. All subspectra were acquired for an equal number of scans (8196). <sup>b</sup> The overall echo spectrum was co-added from two individual experiments that used opposing WURST frequency sweep directions (Natisite: 2 × 32768 scans, AM-1: 2 × 49152 scans).

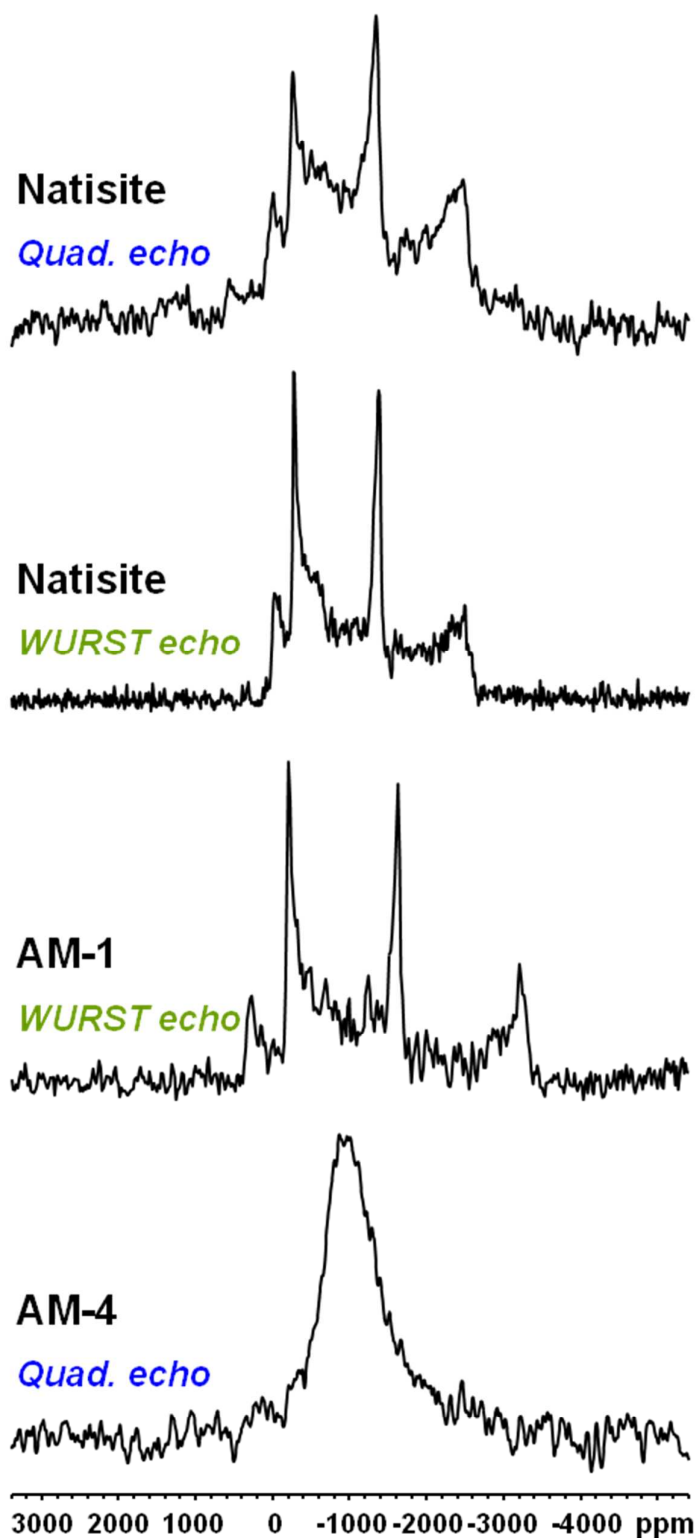

**Figure S2.**  $^{47/49}\text{Ti}$  SSNMR echo spectra of several titanosilicates are shown above. The colored text indicates the pulse sequence used to obtain the spectra, where “Quad. echo” refers to the quadrupolar echo pulse sequence.

## Section S1. $^{29}\text{Si}$ and $^{23}\text{Na}$ SSNMR experimental parameters

$^{29}\text{Si}$  MAS SSNMR experiments were performed on a Varian Infinity Plus 400 wide-bore spectrometer at a magnetic field of 9.4 T ( $\nu_0(^{29}\text{Si}) = 79.36$  MHz) using a 7.5 mm HXY MAS probe operating at spinning frequency of 5 kHz. All spectra were acquired using a Bloch-decay (i.e., one-pulse) sequence which employed 40 kHz continuous-wave  $^1\text{H}$  decoupling. The number of scans acquired for each compound range from 84 to 128. A pulse length of 3  $\mu\text{s}$  (corresponding to a  $45^\circ$   $^{29}\text{Si}$  pulse) and a recycle delay of 60 s were used. The  $^{29}\text{Si}$  chemical shift was referenced using the downfield peak of tris(trimethylsilyl)silane (TTMSS), which is located at  $-9.8$  ppm relative to the peak in tetramethylsilane (TMS) at 0.0 ppm.

$^{23}\text{Na}$  SSNMR experimental conditions are shown in Table S2. Rotor-synchronized  $^{23}\text{Na}$  3QMAS spectra were acquired at a spinning frequency of 20 kHz using the standard Z-filter MQMAS sequence.<sup>1</sup> The excitation, conversion and selection pulse widths of  $^{23}\text{Na}$  were optimized and set as 2.86, 1.03 and 10.00  $\mu\text{s}$ , respectively. FID signals were Fourier-transformed and sheared using the Varian Spinsight software to obtain the separate F1 and F2 dimensions.  $^{23}\text{Na}$  spin-lattice relaxation times ( $T_1$ ) were measured using the inversion-recovery  $180^\circ - \tau - 90^\circ$  sequence (Table S2) to ensure accurate relative intensities of  $\text{Na}^+$  sites. The intensity- $\tau$  plots were fitted by a three-component equation using the Spinsight software.

**Table S2.**  $^{23}\text{Na}$  SSNMR acquisition parameters at 9.4 T.

| Sample   | Experiment | Pulse delay (s) | $T_1$ (s) | Number of scans          |
|----------|------------|-----------------|-----------|--------------------------|
| Natisite | MAS        | 2               | 0.75      | 512                      |
|          | 3QMAS      | 2               |           | 19968 (312 $\times$ 64)  |
| AM-1     | MAS        | 2               | 0.35      | 512                      |
| AM-4     | MAS        | 2               | 0.16      | 1024                     |
|          | 3QMAS      | 2               |           | 19968 (312 $\times$ 64)  |
| GTS-1    | MAS        | 2, 0.2          | 0.0012    | 512                      |
|          | 3QMAS      | 2               |           | 19968 (312 $\times$ 64)  |
| ETS-10   | MAS        | 0.5             | 0.0074    | 1024                     |
|          | 3QMAS      | 0.5             |           | 76800 (600 $\times$ 128) |
| ETS-4    | MAS        | 1               | 0.0013    | 1024                     |
|          | 3QMAS      | 0.5             |           | 19968 (312 $\times$ 64)  |

**Section S2.**  $^{23}\text{Na}$  MAS and 3QMAS spectra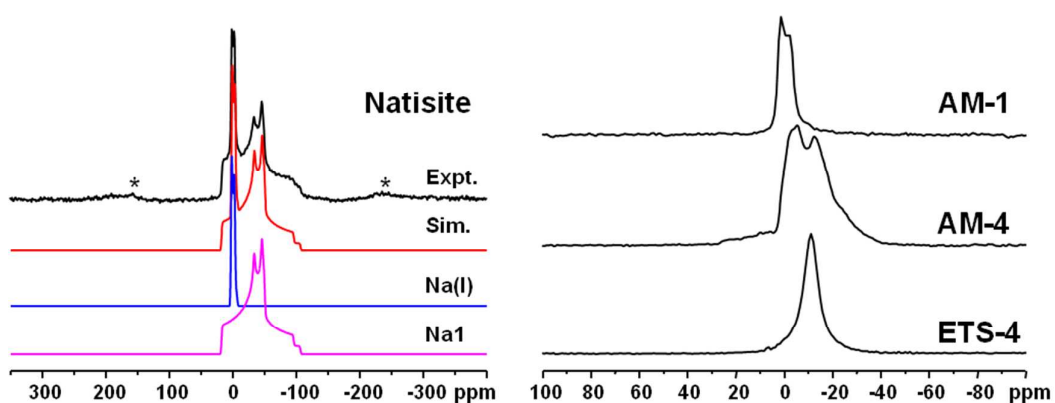**Figure S3.**  $^{23}\text{Na}$  MAS SSNMR spectra at 9.4 T. Spinning sidebands are denoted by \*. Note the differences in chemical shift scales between natisite and the other compounds; the natisite powder pattern is significantly broader.

To the best of our knowledge, this is the first report of  $^{23}\text{Na}$  SSNMR of natisite, and a detailed discussion of those experimental results is provided in the main text. The  $^{23}\text{Na}$  MAS spectra of AM-1, AM-4 and ETS-4 closely resemble those described in previous reports.<sup>2-5</sup>  $^{23}\text{Na}$  3QMAS spectra are depicted in Figure S3. The  $^{23}\text{Na}$  3QMAS spectra of AM-4, sitinakite and ETS-10 appear similar to prior accounts.<sup>2-3, 6-8</sup>

The two Na sites observed in the MAS spectrum of natisite are clearly resolved in the 2D 3QMAS spectrum. Two Na sites were also resolved in the 3QMAS spectrum of ETS-4. Unfortunately, it was not possible to fully differentiate the two Na sites of GTS-1 *via* 3QMAS experiments.

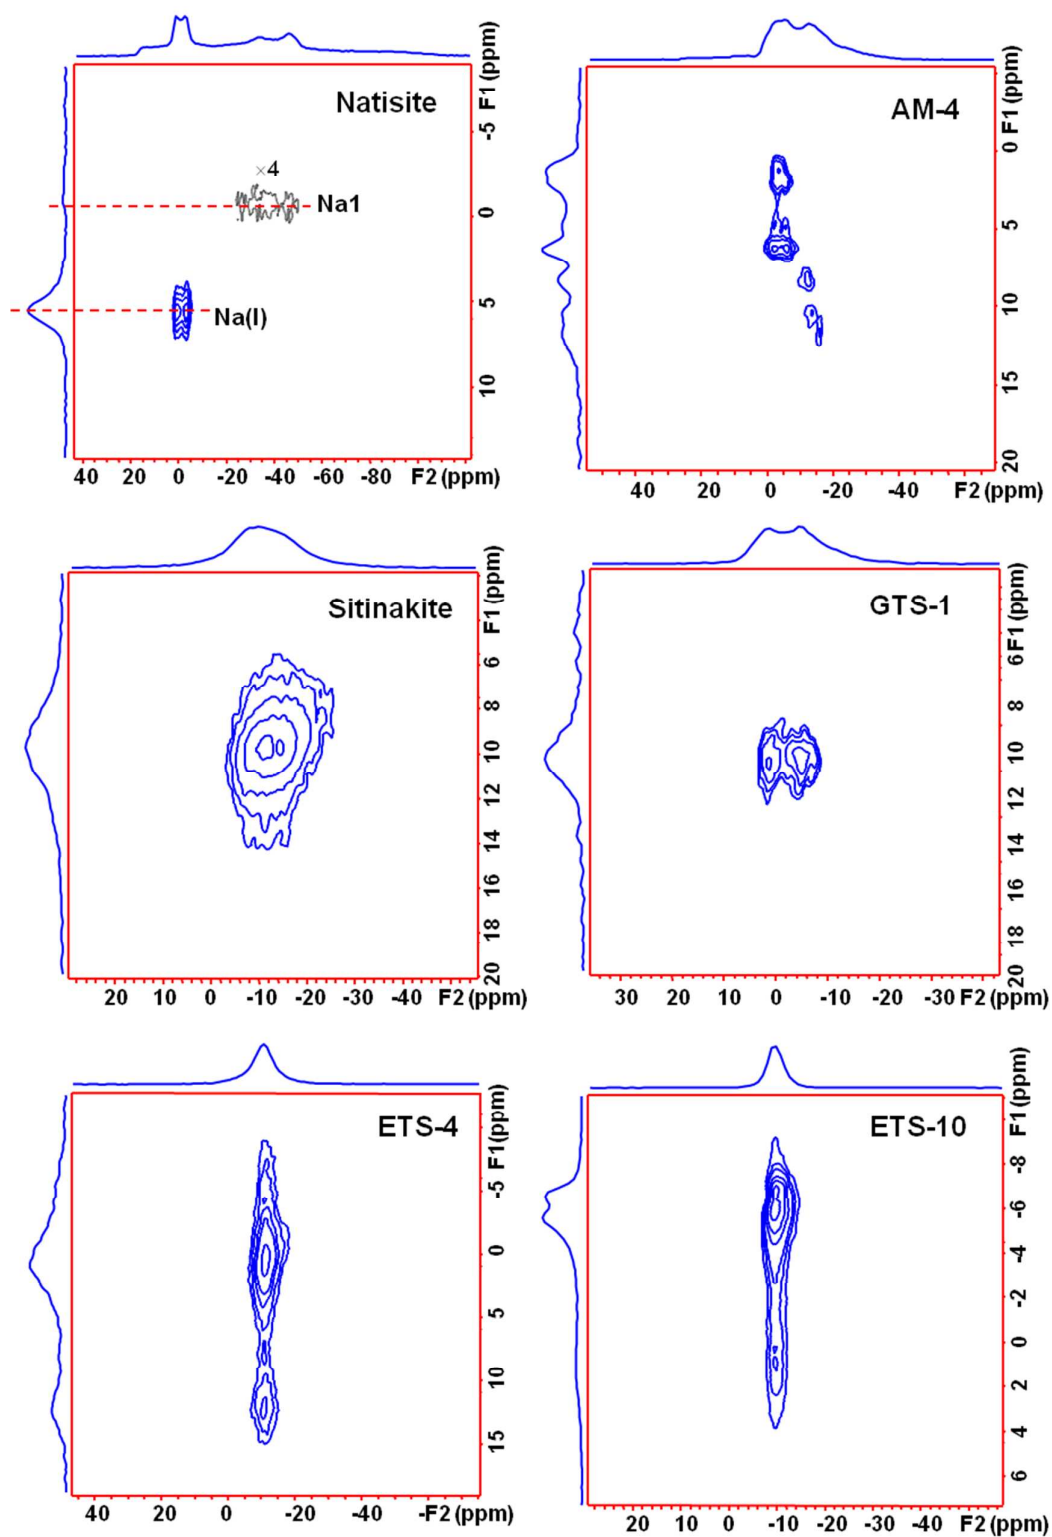

**Figure S4.**  $^{23}\text{Na}$  3QMAS spectra at 9.4 T.



Section S3.  $^{29}\text{Si}$  MAS SSNMR spectra

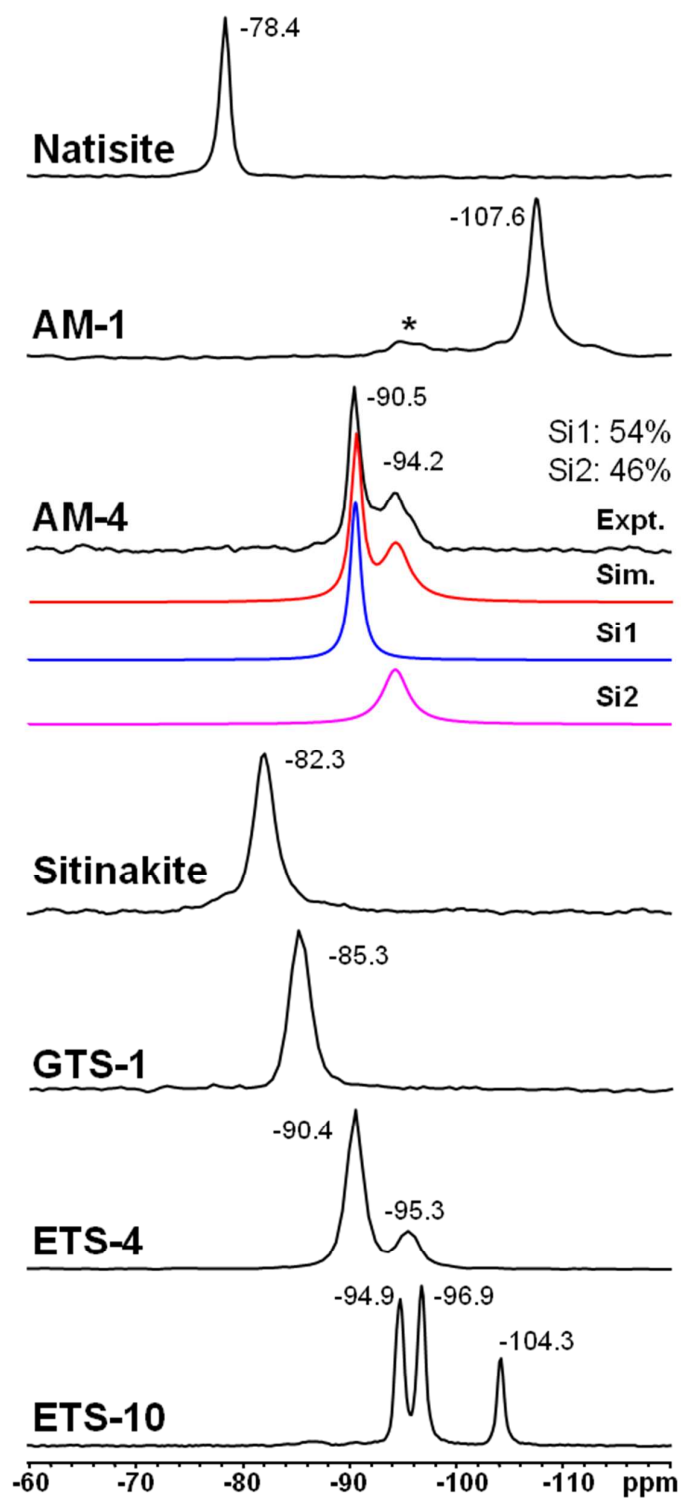

**Figure S5.**  $^{29}\text{Si}$  MAS SSNMR spectra at 9.4 T. \*: impurity.

The  $^{29}\text{Si}$  MAS spectra of our titanosilicate samples look quite similar to those in the literature,<sup>2-5, 9-10</sup> except for natisite and AM-4; these two spectra are discussed in the main text. The spectrum of AM-1 displays a slight Si impurity at ca. -95 ppm whose origins are unknown.

#### The two polymorphs of ETS-10

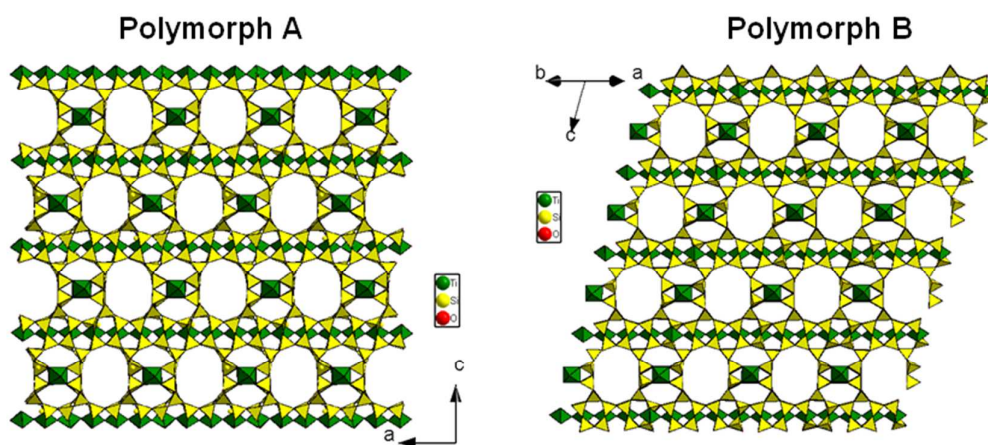

**Figure S6.** The structures of two polymorphs of ETS-10. It is possible to describe the structure of ETS-10 in terms of an intergrowth of two ordered polymorphs with tetragonal (polymorph A) and monoclinic (polymorph B) symmetry. The combined presence of both polymorphs leads to intrinsic disorder and structural faulting within ETS-10.

#### Section S4. $^{47/49}\text{Ti}$ and $^{23}\text{Na}$ SSNMR experiments on ETS-4

The framework of ETS-4 ( $\text{Na}_8(\text{Ti}_5\text{H}_2\text{Si}_{12}\text{O}_{39})(\text{H}_2\text{O})_{8.45}$ ,  $\text{Si}/\text{Ti} \approx 2.1$  from EDS) contains distorted octahedral  $\text{TiO}_6$  chains, isolated square-pyramidal  $\text{TiO}_5$  units, and tetrahedral  $\text{SiO}_4$  (Figure S7).<sup>11</sup> The  $\text{TiO}_6$  octahedra contain the crystallographic Ti1 site and connect to each other by corner-sharing, forming  $-\text{O}-\text{Ti}-\text{O}-\text{Ti}-\text{O}-$  chains along the  $b$  axis in a distinct fashion that contrasts with the edge-sharing brookite-type chains in AM-4. The individual  $\text{TiO}_6$  octahedra are significantly distorted, giving rise to  $\text{O}-\text{Ti}-\text{O}$  bond angles that range from  $63^\circ$  to  $116^\circ$ , far from the idealized  $90^\circ$ . The crystallographic Ti2 site is located in  $\text{TiO}_5$  square-pyramids with four basal oxygen atoms shared with four neighboring symmetry-related  $\text{SiO}_4$  units. Within ETS-4, interactions between neighboring  $\text{TiO}_5$  pyramids are mediated *via* water molecules incorporated into the molecular structure. The anionic framework charges are balanced by extra-framework  $\text{Na}^+$  cations. ETS-4 exhibits an intrinsic disorder of the framework, originating from three sources: i) the 12-rings are only partially occupied by  $\text{TiO}_5$  units (occupancy: 0.25); ii) the orientation of  $\text{TiO}_5$  units with respect to the rest of the framework is random; and iii) water molecules mediating the interactions between neighboring  $\text{TiO}_5$  units are also disordered, although this disorder does not cause the termination of the  $\text{TiO}_6$  chain.

The acquisition of natural abundance  $^{47/49}\text{Ti}$  static echo spectrum of ETS-4 was very challenging, even at 21.1 T. After 16 h of experimental acquisition, the spectrum (Figure S7(b)) obtained consists of a weak and very broad profile from ca. 900 to  $-2600$  ppm. Simulation and interpretation of this  $^{47/49}\text{Ti}$  spectrum is quite challenging

due to the poor S/N, uninformative lineshape, and Ti disorder within this system. Although a signal is obtained, it cannot be unambiguously attributed to one, two, or more resonances; correspondingly, even crude  $^{47/49}\text{Ti}$  EFG tensor parameters are unavailable.  $^{23}\text{Na}$  MAS and 3QMAS experiments on ETS-4 were successful and two  $^{23}\text{Na}$  sites were resolved, but these experiments did not provide additional insight into this compound (Figures S3 and S4, Table A2).

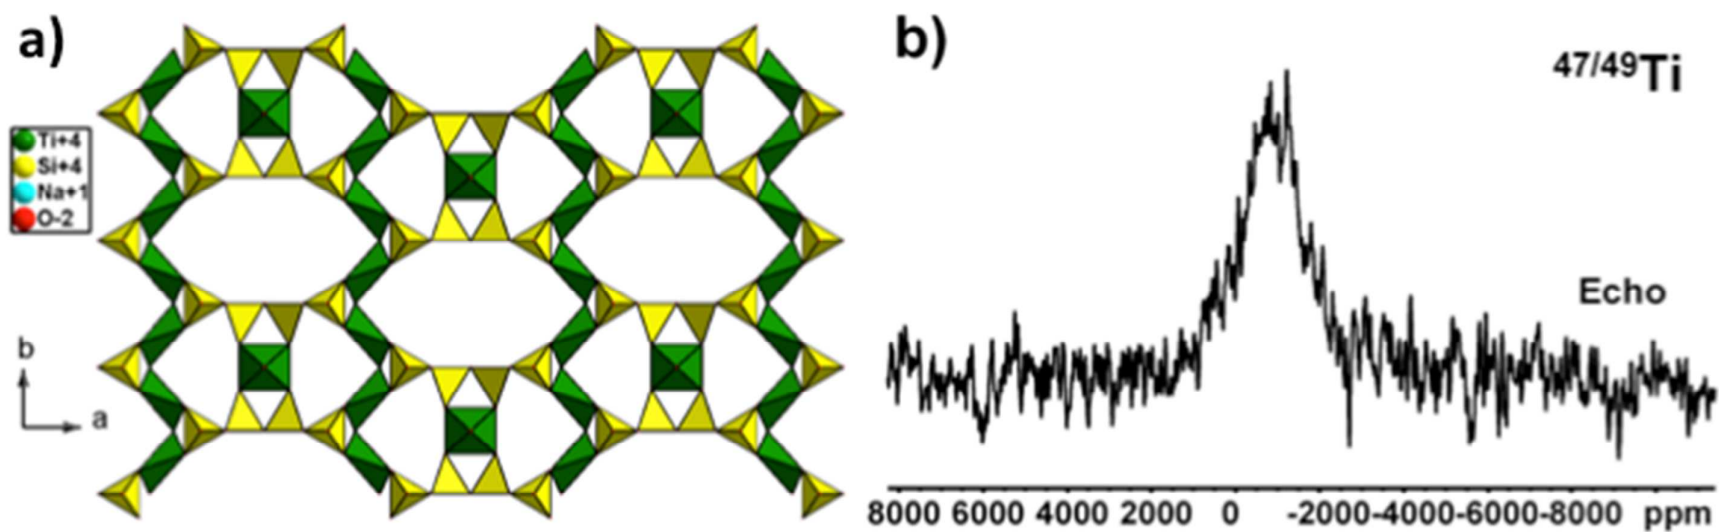

**Figure S7.** (a) The structure of ETS-4 (The water molecules and  $\text{Na}^+$  cations are omitted for clarity). (b) Experimental (echo) natural abundance  $^{47/49}\text{Ti}$  static spectra of ETS-4 at 21.1 T.

## Appendix A: Plane-wave DFT calculations of $^{23}\text{Na}$ , $^{29}\text{Si}$ , and $^{47/49}\text{Ti}$ NMR tensor parameters

We have calculated  $^{29}\text{Si}$ ,  $^{23}\text{Na}$  and  $^{49}\text{Ti}$  NMR tensor parameters for five titanosilicates: natisite, AM-1, AM-4, sitinakite and NaGTS-1. The experimental and calculated NMR parameters of  $^{29}\text{Si}$ ,  $^{23}\text{Na}$  and  $^{49}\text{Ti}$  are shown in Tables A1, A2, and A3, respectively, while correlations of experimental and calculated NMR parameters are depicted in Figures A1 and A2.

As Figure A1 illustrates, a linear relationship was observed between the calculated isotropic chemical shielding of  $^{29}\text{Si}$  ( $\sigma_{\text{iso}}(^{29}\text{Si})$ ) and the experimental isotropic chemical shift ( $\delta_{\text{iso}}(^{29}\text{Si})$ ), with a line of best fit that indicates  $\delta_{\text{iso}}(^{29}\text{Si}) = -0.673\sigma_{\text{iso}}(^{29}\text{Si}) + 186.9$  (in units of ppm). These calculations were used to help assign the two  $^{29}\text{Si}$  SSNMR resonances of AM-4. The two crystallographic Si sites of AM-4 are difficult to assign using only qualitative arguments involving coordination, because although Si1 has 3 neighboring  $\text{Ti}^{4+}$  and Si2 has only 1, Si1 has 2 neighboring  $\text{Na}^+$  centres versus the 6  $\text{Na}^+$  proximate to Si2. Plane-wave DFT results suggest that the less shielded resonance at -90.5 ppm belongs to Si1 while the more shielded resonance at -94.2 ppm is assigned to Si2.

Based on the four titanosilicate samples with ordered Na sites (natisite, AM-1, AM-4 and NaGTS-1), reasonably linear relationships between calculated and experimental  $^{23}\text{Na}$   $C_Q$  and  $\eta_Q$  exist (Figure A1 (b),(c)). The only major discrepancy between calculated and experimental  $C_Q(^{23}\text{Na})$  values is for sitinakite. There is no correlation between experimentally-measured  $\delta_{\text{iso}}$  values and calculated  $\sigma_{\text{iso}}$  values

(Figure A2). It seems that plane-wave DFT calculations are valuable for the interpretation of  $^{23}\text{Na}$  SSNMR spectra for these types of systems, but only as it pertains to  $^{23}\text{Na}$  EFG parameters.

To relate chemical shieldings to shifts, as well as assess the reliability of calculations,  $^{49}\text{Ti}$  NMR parameters were calculated for  $\text{MTiO}_3$  ( $M = \text{Mg, Ca, Sr, Ba}$ ) and three  $\text{TiO}_2$  polymorphs in addition to experimental compounds. Calculated  $^{49}\text{Ti}$  EFG tensor parameters ( $C_Q, \eta_Q$ ) generally agree well with experimental values (Figure A1 (d), (e)). Calculations predict that only the span ( $\Omega$ ) values of natisite and AM-1 will be large enough to make a quantifiable contribution to  $^{47/49}\text{Ti}$  SSNMR spectra, in good agreement with experimental observations. The link between  $\delta_{\text{iso}}$  and calculated  $\sigma_{\text{iso}}$  values is relatively weak, but good agreement still exists in most experimental cases, owing to the inclusion of the additional model Ti compounds in calculations and the correlation plot.

Calculations of  $C_Q(^{49}\text{Ti})$  can be used to interpret the  $^{47/49}\text{Ti}$  SSNMR spectrum of GTS-1 pictured in Figure 5(b) of the main text. Recalling that our GTS-1 sample was a mixture of KGTS-1 and NaGTS-1, we have assigned the resonance observable in the  $^{47/49}\text{Ti}$  SSNMR spectrum of our GTS-1 sample to the crystallographic Ti2 site of NaGTS-1. The degree of distortion associated with the Ti1 site (Ti—O: 1.828-2.107 Å) of NaGTS-1 is significantly larger than that of Ti2 within NaGTS-1 (Ti—O: 1.983-2.100 Å), yielding a  $^{47/49}\text{Ti}$  SSNMR pattern that is of weak intensity and is too broad to be measured, even using an ultra-highfield of 21.1 T. Plane-wave DFT calculations support this conclusion; the calculated  $C_Q(\text{Ti1})$  value of 39.25 MHz is

more than three times larger than the calculated  $C_Q(\text{Ti2})$  value of 10.13 MHz. But what of KGTS-1, which normally exhibits an ordered crystal structure and thus should be observed in the  $^{47/49}\text{Ti}$  SSNMR spectrum? The  $^{39}\text{K}$  SSNMR spectrum of KGTS-1 shows that a significant fraction of the  $\text{K}^+$  sites in GTS-1 are disordered (Figure 6(b)), injecting a large degree of uncertainty into plane-wave DFT calculations. Unfortunately, attempts to calculate the  $C_Q(^{49}\text{Ti})$  of KGTS-1 fail without the reduction of crystal symmetry. We can instead qualitatively estimate the  $C_Q(^{49}\text{Ti})$  of KGTS-1 by comparing the degree of distortion of  $\text{TiO}_6$  units. The Ti—O bond length distribution of the single Ti site of KGTS-1 (1.851-2.048 Å) is relatively large and comparable to that of the Ti1 site of NaGTS-1. It follows that, much like the Ti1 site of NaGTS-1, the  $C_Q(^{49}\text{Ti})$  of the Ti site in KGTS-1 most likely results in a  $^{47/49}\text{Ti}$  SSNMR powder pattern that is simply too broad and of too low S/N to be detected at 21.1 T.

**Table A1.** Experimental and calculated  $^{29}\text{Si}$  NMR parameters.

| Sample            | Si Site | Si Environment | $\delta_{\text{iso}}$ (ppm) |                         | $\sigma_{\text{iso}}$ (ppm) |
|-------------------|---------|----------------|-----------------------------|-------------------------|-----------------------------|
|                   |         |                | Experimental                | Calculated <sup>a</sup> | Calculated                  |
| Natisite          | Si1     | Si(4Ti)        | -78.4                       | -83.7                   | 402.15                      |
| AM-1              | Si1     | Si(1Ti)        | -107.6                      | -105.2                  | 434.07                      |
| AM-4 <sup>b</sup> | Si1     | Si(3Ti)        | -90.5                       | -92.4                   | 414.95                      |
|                   | Si2     | Si(1Ti)        | -94.2                       | -94.8                   | 418.57                      |
| Sitinakite        | Si1     | Si(4Ti)        | -82.3                       | -77.7                   | 393.23                      |
| NaGTS-1           | Si1     | Si(4Ti)        | -85.3                       | -84.2                   | 402.82                      |
| ETS-4             | Si(I)   | Si(3Ti)        | -90.4                       | -                       | -                           |
|                   | Si(II)  | Si(1Ti)        | -95.3                       | -                       | -                           |
| ETS-10            | Si(I)   | Si(1Ti)        | -94.9                       | -                       | -                           |
|                   | Si(II)  | Si(1Ti)        | -96.9                       | -                       | -                           |
|                   | Si(III) | Si(0Ti)        | -104.3                      | -                       | -                           |

<sup>a</sup> Calculated  $\sigma_{\text{iso}}$  values were converted to  $\delta_{\text{iso}}$  by using the relationship  $\delta_{\text{iso}} = -0.673\sigma_{\text{iso}} + 186.9$ , the line of best fit corresponding to the graph in Figure A1(a). <sup>b</sup> This structure was not geometry optimized prior to calculation of NMR tensor parameters, unlike all others.



**Table A2.** Experimental and calculated  $^{23}\text{Na}$  NMR parameters.

| Sample     | Na site | Na coordination | $ C_Q $ (MHz) |            | $\eta_Q$      |            | $\delta_{\text{iso}}$ (ppm) |                         | $\sigma_{\text{iso}}$ (ppm) |
|------------|---------|-----------------|---------------|------------|---------------|------------|-----------------------------|-------------------------|-----------------------------|
|            |         |                 | Experimental  | Calculated | Experimental  | Calculated | Experimental                | Calculated <sup>a</sup> | Calculated                  |
| Natisite   | Na1     | 6               | 4.5(1)        | 4.28       | 0.8(1)        | 0.81       | 18.6(2)                     | 4.5                     | 544.28                      |
|            | Na(I)   |                 | 1.4(1)        | -          | 0.0(1)        | -          | 3.0(6)                      | -                       | -                           |
| AM-1       | Na1     | 6               | 1.4(1)        | 1.75       | 0.2(1)        | 0.22       | 4.0(6)                      | 4.0                     | 434.07                      |
| AM-4       | Na1     | 6               | 2.1(1)        | 2.21       | 1.0(1)        | 0.80       | 0.9(10)                     | 4.6                     | 559.96                      |
|            | Na2     | 6               | 1.7(1)        | 1.47       | 0.3(1)        | 0.31       | -3.0(10)                    | 4.6                     | 557.40                      |
|            | Na3     | 4               | 2.5(1)        | 3.90       | 0.9(1)        | 0.88       | 0.3(10)                     | 4.4                     | 523.36                      |
|            | Na(I)   |                 | 1.3(1)        | -          | 0.0(1)        | -          | 1.1(10)                     | -                       | -                           |
| Sitinakite | Na(I)   | 6               | 1.9(1)        | 6.22       | 0.5(1)        | 0.69       | 0.4(10)                     | 4.6                     | 561.20                      |
|            | Na(II)  | 6               | $1.9 \pm 0.9$ | 4.98       | $0.9 \pm 0.1$ | 0.53       | 5.7                         | 4.8                     | 602.54                      |
| NaGTS-1    | Na1     | 4               | 1.8(1)        | 1.92       | 0.1(1)        | 0.00       | 6.0(10)                     | 4.8                     | 596.38                      |
|            | Na2     | 6               | 2.2(1)        | 3.50       | 1.0(1)        | 0.63       | 8.3(10)                     | 4.6                     | 551.98                      |
| ETS-4      | Na1     |                 | 1.8(1)        | -          | 0.8(1)        | -          | -1.7(5)                     | -                       | -                           |
|            | Na2     |                 | 1.6(1)        | -          | 0.8(1)        | -          | -3.4(5)                     | -                       | -                           |
| ETS-10     | Na(I)   |                 | 1.0(1)        | -          | 0.4(2)        | -          | -7.4(10)                    | -                       | -                           |
|            | Na(II)  |                 | 1.1(1)        | -          | 0.5(2)        | -          | -6.2(10)                    | -                       | -                           |
|            | Na(III) |                 | 1.2(1)        | -          | 0.5(2)        | -          | -6.1(10)                    | -                       | -                           |
|            | Na(IV)  |                 | 1.2(1)        | -          | 0.6(2)        | -          | -5.9(10)                    | -                       | -                           |

<sup>a</sup> Calculated  $\sigma_{\text{iso}}$  values were converted to  $\delta_{\text{iso}}$  by using the relationship  $\delta_{\text{iso}} = 0.0048\sigma_{\text{iso}} + 1.9277$ , the line of best fit corresponding to the graph in Figure A2. It should be noted that there is no measurable correlation in that graph, hence, calculated  $\delta_{\text{iso}}$  values match experimental  $\delta_{\text{iso}}$  values poorly in most cases.

**Table A3.** Experimental and calculated  $^{49}\text{Ti}$  NMR parameters.<sup>a</sup>

| Sample             | Ti<br>site | Ti<br>coordination | $ C_Q $ (MHz) |             | $\eta_Q$        |       | $\delta_{\text{iso}}$ (ppm) |        | $\sigma_{\text{iso}}$ (ppm) | $\Omega$ (ppm) |        | $\kappa$ |       |
|--------------------|------------|--------------------|---------------|-------------|-----------------|-------|-----------------------------|--------|-----------------------------|----------------|--------|----------|-------|
|                    |            |                    | Expt.         | Calc.       | Expt.           | Calc. | Expt.                       | Calc.  | Calc.                       | Expt.          | Calc.  | Expt.    | Calc. |
| Natisite           | 1          | 5                  | 10.7(1)       | 9.88        | 0.05(5)         | 0.00  | -740(30)                    | -769.5 | -297.33                     | 500(30)        | 644.94 | 1.0(1)   | 1.00  |
| AM-1               | 1          | 5                  | 13.4(1)       | 17.05       | 0.05(5)         | 0.00  | -783(30)                    | -874.1 | -180.30                     | 500(30)        | 705.39 | 1.0(1)   | 1.00  |
| AM-4               | 1          | 6                  | 8.2(2)        | 11.13       | 1.0(1)          | 0.92  | -850(30)                    | -916.7 | -132.71                     | -              | 127.35 | -        | 0.55  |
| Sitinakite         | 1          | 6                  | 13 $\pm$ 11   | 8.70        | 0.85 $\pm$ 0.15 | 0.45  | -950                        | -922.8 | -125.80                     | -              | 97.83  | -        | 0.68  |
| NaGTS-1            | 1          | 6                  | -             | 39.25       | -               | 0.00  | -                           | -951.0 | -94.26                      | -              | 52.44  | -        | 1.00  |
|                    | 2          | 6                  | 11.0(5)       | 10.13       | 0.4(2)          | 0.52  | -900(40)                    | -921.1 | -127.69                     | -              | 129.56 | -        | 0.20  |
| ETS-10             | 1          | 6                  | 16.5(2)       | -           | 0.85(10)        | -     | -1100(50)                   | -      | -                           | -              | -      | -        | -     |
| Rutile             | 1          | 6                  | 13.9          | 10.45       | 0.19            | 0.43  | -843                        | -899.8 | -151.58                     | -              | 122.92 | -        | 0.03  |
| Anatase            | 1          | 6                  | 4.7           | 4.85        | 0               | 0.00  | -1038                       | -949.0 | -96.52                      | -              | 141.38 | -        | 1.00  |
| Brookite           | 1          | 6                  | 6.04          | 7.20        | 0.55            | 0.39  | -943                        | -949.8 | -95.69                      | -              | 173.96 | -        | -0.66 |
| MgTiO <sub>3</sub> | 1          | 6                  | 15.52(5)      | 13.86       | 0.00(5)         | 0.00  | -993(10)                    | -862.2 | -193.67                     | -              | 176.70 | -        | 0.00  |
| CaTiO <sub>3</sub> | 1          | 6                  | 2.75(1)       | 3.02        | 0.70(6)         | 0.95  | -853.5(10)                  | -857.3 | -199.16                     | -              | 42.04  | -        | -0.81 |
| SrTiO <sub>3</sub> | 1          | 6                  | $\approx$ 0   | $\approx$ 0 | N/A             | N/A   | -843                        | -835.0 | -224.09                     | -              | N/A    | -        | N/A   |
| BaTiO <sub>3</sub> | 1          | 6                  | 3.42(5)       | 2.39        | 0.00(5)         | 0.00  | -731(1)                     | -709.8 | -364.12                     | 22.5(1)        | 2.60   | 1        | 1.00  |

<sup>a</sup> All experimental data for rutile,<sup>12</sup> anatase,<sup>12-14</sup> and brookite TiO<sub>2</sub>,<sup>15</sup> as well as MTiO<sub>3</sub> (M = Mg,<sup>16</sup> Ca,<sup>12,16</sup> Sr,<sup>17</sup> Ba<sup>16</sup>) was taken from the literature.<sup>18</sup> Calculations on these compounds were performed using the crystal structures of rutile,<sup>19</sup> anatase,<sup>20</sup> and brookite<sup>21</sup> TiO<sub>2</sub>, as well as MTiO<sub>3</sub> (M = Mg,<sup>22</sup> Ca,<sup>23</sup> Sr,<sup>24</sup> Ba<sup>25</sup>) after geometry optimization. <sup>b</sup> Chemical shifts ( $\delta_{\text{iso}}$ ) were calculated by using the formula  $\delta_{\text{iso}} = -0.894\sigma_{\text{iso}} - 1035.3$ , which is the line of best fit on a graph of experimental  $\delta_{\text{iso}}$  vs. calculated  $\sigma_{\text{iso}}$  (Figure A1(f)).

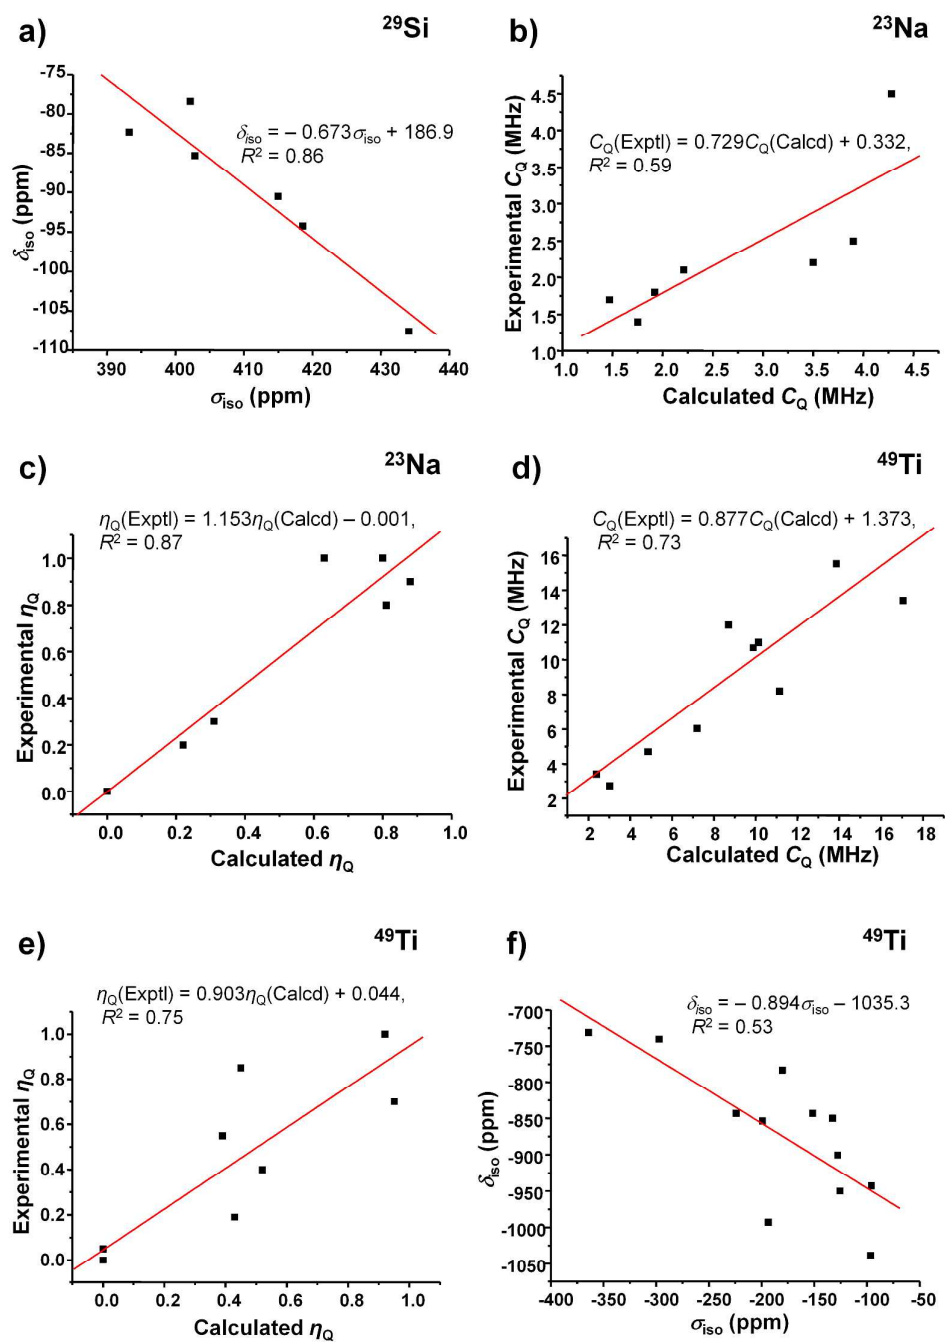

**Figure A1.** Correlation between the measured  $^{29}\text{Si}$   $\delta_{\text{iso}}$  (a),  $^{23}\text{Na}$   $C_Q$  (b) and  $\eta_Q$  (c),  $^{49}\text{Ti}$   $C_Q$  (d),  $\eta_Q$  (e) and  $\delta_{\text{iso}}$  (f) with the calculated values.

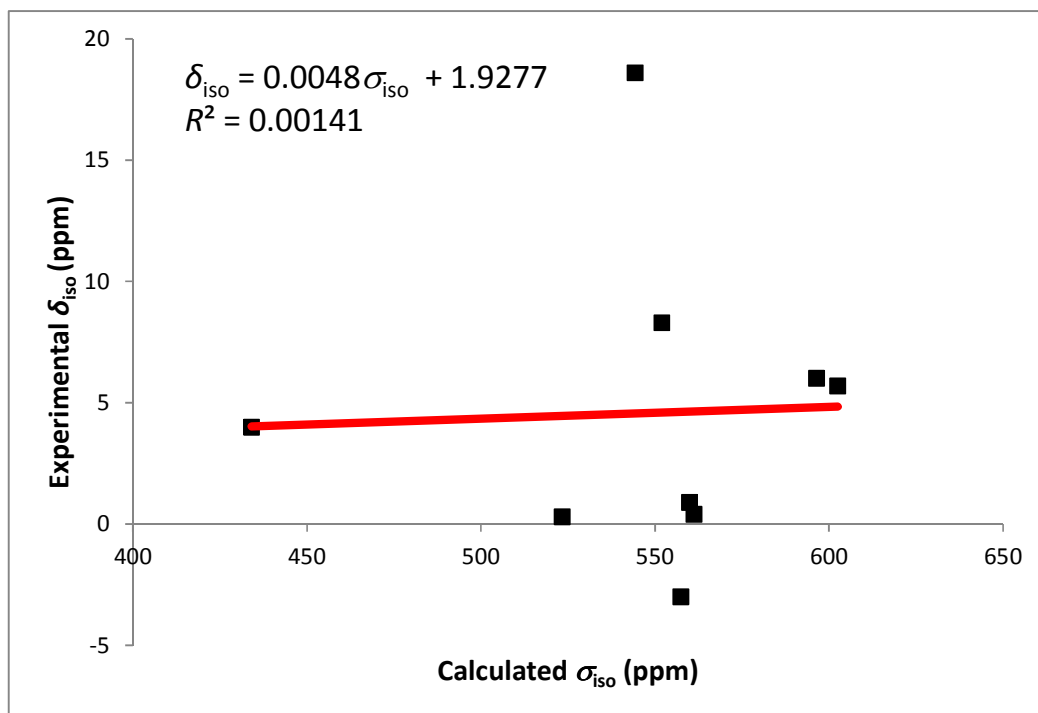

**Figure A2.** A plot of experimental  $^{23}\text{Na}$  chemical shifts versus calculated  $^{23}\text{Na}$  chemical shieldings. There is no clear correlation, resulting in calculated chemical shifts that stray significantly from experimental values (Table A2).

## References

1. Amoureux, J. P.; Fernandez, C.; Steuernageel, S. Z Filtering in MQMAS NMR. *J. Magn. Reson., Ser. A*. **1996**, *123*, 116-118.
2. Lin, Z.; Rocha, J.; Brandao, P.; Ferreira, A.; Esculcas, A. P.; Pedrosa de Jesus, J. D.; Philippou, A.; Anderson, M. W. Synthesis and Structural Characterization of Microporous Umbite, Penkvilksite, and Other Titanosilicates. *J. Phys. Chem. B* **1997**, *101*, 7114-7120.
3. Cherry, B. R.; Nyman, M.; Alam, T. M. Investigation of Cation Environment and Framework Changes in Silicotitanate Exchange Materials Using Solid-State  $^{23}\text{Na}$ ,  $^{29}\text{Si}$ , and  $^{133}\text{Cs}$  MAS NMR. *J. Solid State Chem.* **2004**, *177*, 2079-2093.

4. Thorogood, G. J.; Kennedy, B. J.; Griffith, C. S.; Elcombe, M. M.; Avdeev, M.; Hanna, J. V.; Thorogood, S. K.; Luca, V. Structure and Phase Transformations in the Titanosilicate, Sitinakite. The Importance of Water. *Chem. Mater.* **2010**, *22*, 4222-4231.
5. Kostov-Kytin, V.; Nikolova, R.; Nakayama, N.; Simova, S.; Tzvetkova, P. New Data on Crystal Chemistry of Nano-Sized Microporous Titanosilicates with Pharmacosiderite Structure. *C. R. Acad. Bulg. Sci.* **2011**, *64*, 683-692.
6. Ganapathy, S.; Das, T. K.; Vetrivel, R.; Ray, S.; Sen, T.; Sivasanker, S.; Delevoye, L.; Fernandez, C.; Amoureux, J. P. Anisotropic Chemical Shielding, M-Site Ordering, and Characterization of Extraframework Cations in ETS-10 Studied through MAS/MQ-MAS NMR and Molecular Modeling Techniques. *J. Am. Chem. Soc.* **1998**, *120*, 4752-4762.
7. Anderson, M. W.; Agger, J. R.; Luigi, D.-P.; Baggaley, A. K.; Rocha, J. Cation Sites in ETS-10:  $^{23}\text{Na}$  3Q MAS NMR and Lattice Energy Minimization Calculations. *Phys. Chem. Chem. Phys.* **1999**, *1*, 2287-2292.
8. Southon, P. D.; Howe, R. F. Spectroscopic Studies of Disorder in the Microporous Titanosilicate ETS-10. *Chem. Mater.* **2002**, *14*, 4209-4218.
9. Anderson, M. W.; Terasaki, O.; Ohsuna, T.; Philippou, A.; Mackay, S. P.; Ferreira, A.; Rocha, J.; Lidin, S. Structure of the Microporous Titanosilicate ETS-10. *Nature* **1994**, *367*, 347-351.
10. Balmer, M. L.; Bunker, B. C.; Wang, L. Q.; Peden, C. H. F.; Su, Y. Solid-State  $^{29}\text{Si}$  MAS NMR Study of Titanosilicates. *J. Phys. Chem. B* **1997**, *101*, 9170-9179.

11. Cruciani, G.; De Luca, P.; Nastro, A.; Pattison, P. Rietveld Refinement of the Zorite Structure of ETS-4 Molecular Sieves. *Micropor. Mesopor. Mat.* **1998**, *21*, 143-153.
12. Bastow, T. J.; Gibson, M. A.; Forwood, C. T.  $^{47}\text{Ti}$ ,  $^{49}\text{Ti}$  NMR: Hyperfine Interactions in Oxides and Metals. *Solid State Nucl. Magn. Reson.* **1998**, *12*, 201-209.
13. Kanert, O.; Kolem, H. The Unusual Temperature-Dependence of the Electric-Field Gradient at Titanium Sites in Rutile ( $\text{TiO}_2$ ). *Journal of Physics C-Solid State Physics* **1988**, *21*, 3909-3916.
14. Labouriau, A.; Earl, W. L. Titanium Solid-State NMR in Anatase, Brookite and Rutile. *Chem. Phys. Lett.* **1997**, *270*, 278-284.
15. Bastow, T. J.; Doran, G.; Whitfield, H. J. Electron Diffraction and  $^{47}\text{Ti}$ ,  $^{49}\text{Ti}$  and  $^{17}\text{O}$  NMR Studies of Natural and Synthetic Brookite. *Chem. Mater.* **2000**, *12*, 436-439.
16. Padro, D.; Howes, A. P.; Smith, M. E.; Dupree, R. Determination of Titanium Nmr Parameters of  $\text{ATiO}_3$  Compounds: Correlations with Structural Distortion. *Solid State Nucl. Magn. Reson.* **2000**, *15*, 231-236.
17. Dec, S. F.; Davis, M. F.; Maciel, G. E.; Bronnimann, C. E.; Fitzgerald, J. J.; Han, S. S. Solid-State Multinuclear NMR Studies of Ferroelectric, Piezoelectric, and Related Materials. *Inorg. Chem.* **1993**, *32*, 955-959.
18. Mackenzie, K. J. D.; Smith, M. E., *Multinuclear Solid-State Nuclear Magnetic Resonance of Inorganic Materials*. Pergamon Press: Oxford, UK, 2002.
19. Meagher, E. P.; Lager, G. A. Polyhedral Thermal Expansion in the  $\text{TiO}_2$  Polymorphs: Refinement of the Crystal Structures of Rutile and Brookite at High Temperature. *Can. Mineral.* **1979**, *17*, 77-85.

20. Wyckoff, R. W. G., *Crystal Structures*. Interscience Publishers: New York, 1963.
21. Pauling, L.; Sturdivant, J. H. The Crystal Structure of Brookite. *Z. Kristallogr.* **1928**, *68*, 239-256.
22. Wechsler, B. A.; Vondreele, R. B. Structure Refinements of  $\text{Mg}_2\text{TiO}_4$ ,  $\text{MgTiO}_3$  and  $\text{MgTi}_2\text{O}_5$  by Time-of-Flight Neutron Powder Diffraction. *Acta Crystallogr. Sect. B: Struct. Sci.* **1989**, *45*, 542-549.
23. Liu, X.; Liebermann, R. C. X-Ray-Powder Diffraction Study of  $\text{CaTiO}_3$  Perovskite at High-Temperatures. *Phys. Chem. Miner.* **1993**, *20*, 171-175.
24. Mitchell, R. H.; Chakhmouradian, A. R.; Woodward, P. M. Crystal Chemistry of Perovskite-Type Compounds in the Tausonite-Loparite Series,  $(\text{Sr}_{1-2x}\text{Na}_x\text{La}_x)\text{TiO}_3$ . *Phys. Chem. Miner.* **2000**, *27*, 583-589.
25. Buttner, R. H.; Maslen, E. N. Structural Parameters and Electron Difference Density in  $\text{BaTiO}_3$ . *Acta Crystallogr. Sect. B: Struct. Sci.* **1992**, *48*, 764-769.
